# Supplementary material
Source: PubMed Central journal article supplement (PMC7362345)
Supplement: advancesADV2020001761-suppl1.pdf [file advancesADV2020001761-suppl1.pdf]

## **Online data supplement**

### **Flow studies on human GPVI-deficient blood under coagulating and non-coagulating conditions**

\*Magdolna Nagy, \*Gina Perrella, Amanda Dalby, M. Francisca Becerra, Lourdes Garcia Quintanilla, Jeremy A Pike, Neil V Morgan, Elizabeth E Gardiner, Johan WM Heemskerk, Lorena Azócar, Juan Francisco Miquel, Diego Mezzano and Steve P Watson

## **Supplementary materials and methods**

### **Reagents**

D-Phe-Pro-Arg chloromethyl ketone (PPACK), anti-Syk (sc-1240) monoclonal antibody (mAb), anti-PLC $\gamma$ 2 mAb (sc-5283), anti-GPIb $\alpha$  mAb (sc-59052) and anti-Rho A mAb (sc-418) were from Santa Cruz Biotechnology (Santa Cruz, CA, USA). Collagen type I was from Nycomed Pharma (Munich, Germany). D-dimer was from HYPHEN BioMed (Neuville-sur-Oise, France). Von Willebrand factor (VWF), anti-P-LAT (Y200) (ab68139) mAb and anti-Btk antibody (ab189434) came from Abcam (Cambridge, UK). Rhodocytin was purified as described<sup>1</sup>. Recombinant tissue factor (rTF; Innovin) was purchased from Siemens (Erlanger, Germany). The antibody to the GPVI tail has been described<sup>2</sup>. Annexin-A5-Alexa Fluor-647 was from Invitrogen (Bleiswijk, The Netherlands). Other reagents including bovine serum albumin (BSA: fatty acid free,  $\geq$ 96%), formalin, anti- $\alpha$ -tubulin mouse mAb (T6199), anti-FcR $\gamma$  antibody (06-727), anti-P-Tyrosine mAb (4G10) (05-321) and anti-LAT antibody (06-807) were by Sigma-Aldrich (St. Louis, MO, USA). Anti-P-Syk (Y525/526) mAb (2710), anti-P-PLC $\gamma$ 2 (Y1217) antibody (3871) and GPIIb mAb (13807) were from Cell Signaling (Massachusetts, USA). Anti-CLEC-2 antibody (AF1718) were from R&D Systems (Minneapolis, USA). Z-Gly-Gly-Arg AMC.HCl substrate was from Bachem (Torrance, CA, USA). BigDye Terminator sequencing kit v3.1 and NuPAGE<sup>TM</sup> 4-12% Bis-Tris gel were purchased from Thermo Fisher Scientific (Massachusetts, USA). mAb 6F1 was a kind gift from Barry Coller (Rockefeller, USA).

### **Mice**

Experiments were performed in accordance with UK laws (Animal [Scientific Procedures] Act 1986) with approval of local ethics committee and UK Home Office approval under PPL P0E98D513. The following mice were used: the ITAM-deficient strains. The GPVI-null mice were the kind gift of Jerry Ware<sup>3</sup> and were bred as homozygous mice with wild type mice purchased. All mice were on a C57Bl/6 background.

### **Blood and platelet preparation**

Washed platelets were obtained by centrifugation using prostacyclin (56 nM) and resuspended in Tyrode (137 mM NaCl, 0.36 mM Na<sub>2</sub>HPO<sub>4</sub>, 2.68 mM KCl, 11.9 mM NaHCO<sub>3</sub>, 0.05 g glucose, 2 mM MgCl<sub>2</sub>; pH6.2). They were pelleted by centrifugation at 1500 g for 9 min and resuspended at 2x10<sup>7</sup>/mL for static adhesion or 4x10<sup>8</sup>/mL for aggregation and phosphorylation measurements.

## Western blotting

Immunoblotting was performed with rabbit anti-human GPVI cytoplasmic tail antibody (1µg/ml), anti-FcR $\gamma$  (1:500), anti-Syk (1:200), anti- $\alpha$ -tubulin (1:1000), anti-phosphotyrosine (1:1000), anti-P-PLC $\gamma$ 2 (Y1217) (1:250), anti-P-LAT (Y200) (1:500), anti-P-Syk (Y525/526) (1:500), anti-GPIb $\alpha$  (1:500), anti-PLC $\gamma$ 2 (1:200), anti-Btk (1:500), anti-CLEC-2 (1:500), anti-LAT (1:500), anti-Rho A (1:200) and anti-GPIIb (1:500) overnight at 4°C.

## References

1. Hooley E, Papagrigoriou E, Navdaev A, et al. The crystal structure of the platelet activator aggregin reveals a novel (alphabeta)<sub>2</sub> dimeric structure. *Biochemistry*. 2008;47(30):7831-7837.
2. Gardiner EE, Karunakaran D, Shen Y, Arthur JF, Andrews RK, Berndt MC. Controlled shedding of platelet glycoprotein (GP)VI and GPIb-IX-V by ADAM family metalloproteinases. *J Thromb Haemost*. 2007;5(7):1530-1537.
3. Kato K, Kanaji T, Russell S, et al. The contribution of glycoprotein VI to stable platelet adhesion and thrombus formation illustrated by targeted gene deletion. *Blood*. 2003;102(5):1701-1707.

## Supplementary figures

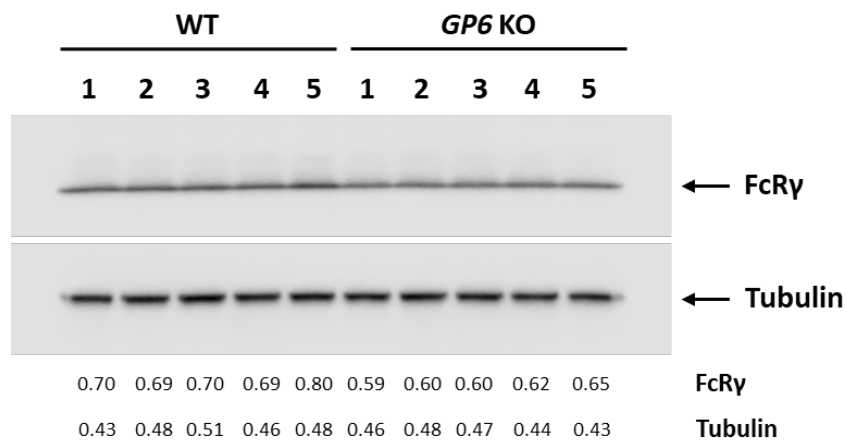

**Supplementary Figure 1.** Western blot of the FcR  $\gamma$ -chain (FcR $\gamma$ ) in five wild type and five *GP6* KO mouse platelets. The densitometry levels are shown. The same amount of platelet protein was loaded in each lane as shown by reprobing for tubulin.

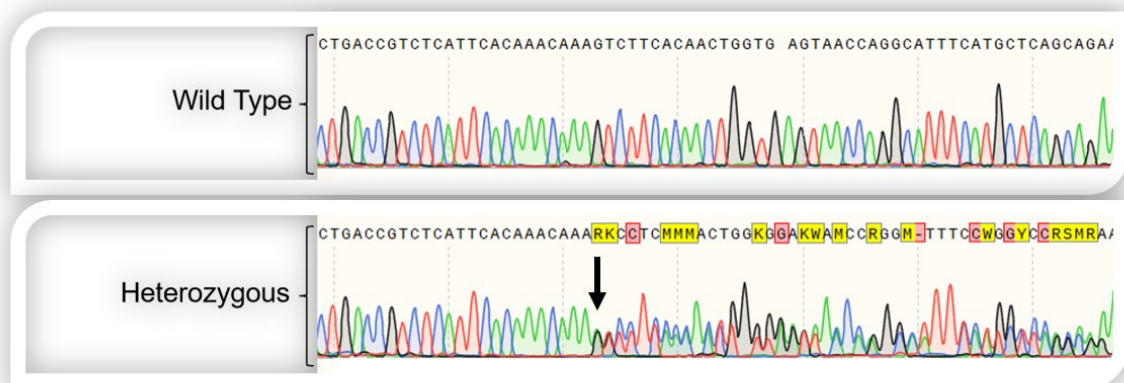

**Supplementary Figure 2.** Representative gene sequence traces of a wild type sample and *GP6*<sup>het</sup> sample. Overlapping sequences represent two separate alleles, starting at the insert site of the c.711\_712insA mutation (arrowed).

**Supplementary Table 1: Bleeding Assessment Tool (BAT) score of GPVI homozygous and heterozygous individuals.**

A bleeding assessment tool (BAT) developed by one of the authors<sup>1</sup> was used to generate a score for  $GP6^{\text{hom}}$  individuals. The BAT score of six  $GP6^{\text{het}}$  individuals (5 female, 1 male) was between 0 – 2; one  $GP6^{\text{het}}$  individual had a BAT score of 5.5. The asterix illustrate the individuals who donated blood in this study.

|                                      | BAT score | Bleeding symptoms                                                                                                                                             |
|--------------------------------------|-----------|---------------------------------------------------------------------------------------------------------------------------------------------------------------|
| <b><math>GP6^{\text{hom}}</math></b> |           |                                                                                                                                                               |
| Female, age 33*                      | 19        | Bleeding after tooth extraction and surgery, heavy menstrual bleeding, abnormal bruising, superficial hematomas, hemoptysis (once).                           |
| Female, age 9*                       | 10        | Abnormal bruising.                                                                                                                                            |
| Female, age 22                       | 18        | Heavy menstrual bleeding leading to acute anaemia, required multiple blood transfusions, abnormal bruising, epistaxis, excessive bleeding after minor injury. |
| Male, age 20*                        | 6.5       | Ecchymosis in unusual sites, prolonged bleeding after mild injuries, superficial hematomas.                                                                   |
| Female, age 12*                      | 1         | Easy bruising; no surgery or menarche.                                                                                                                        |
| Female, age 22                       | 6         | Heavy menstrual bleeding, easy bruising, epistaxis.                                                                                                           |
| Female, age 39                       | 11        | Heavy bruising, heavy menstrual bleeding, bleeding after minor injuries; no bleeding during cesarean section.                                                 |
| Male, age 10*                        | 8         | Epistaxis (3 cauteries), bruising in unusual sites, prolonged bleeding after mild injuries.                                                                   |

**References**

1. Quiroga T, Goycoolea M, Panes O et al. High prevalence of bleeders of unknown cause among patients with inherited mucocutaneous bleeding. A prospective study of 280 patients and 299 controls. *Haematologica* 2007; 92:357-365
